# Supplementary material for: Graded Ca2+/calmodulin-dependent coupling of voltage-gated CaV1.2 channels
Source: eLife journal article supplement (doi:10.7554/elife.05608), 2015-02-24
Supplement: figures [file elife-05608-figures-v2.pdf]

---

## Figures and figure supplements

Graded  $\text{Ca}^{2+}$ /calmodulin-dependent coupling of voltage-gated  $\text{Ca}_v1.2$  channels

**Rose E Dixon, et al.**

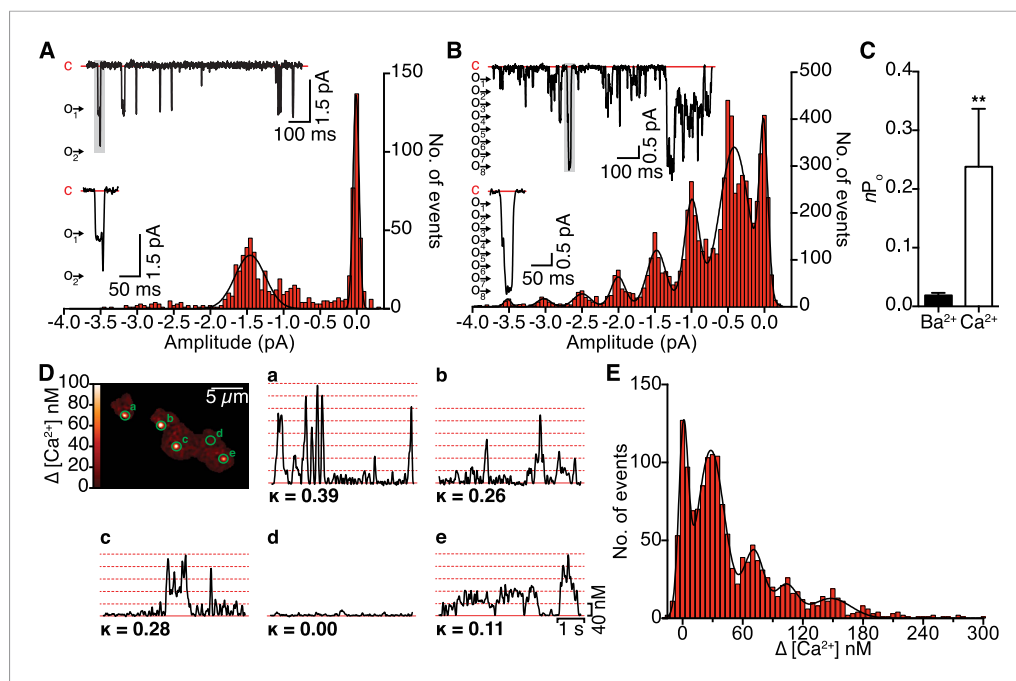

**Figure 1.** Single-channel electrical and optical recordings of  $\text{Ca}_v1.2$  channel coupling. (**A** and **B**) Representative  $i_{\text{Ba}}$  (**A**) and  $i_{\text{Ca}}$  (**B**) traces and their  $\kappa$  values, recorded from  $\text{Ca}_v1.2$ -expressing tsA-201 cells during step depolarizations from  $-80$  to  $-30$  mV. Amplitude histograms (constructed from  $n = 6$  cells each) were fit with multi-component Gaussian functions (solid black lines). A portion of each trace (gray box) is shown enlarged below, showing that the resulting L-type  $\text{Ca}^{2+}$  current reflects the simultaneous opening and closing of multiple channels with  $\text{Ca}^{2+}$  as the charge carrier, but not with  $\text{Ba}^{2+}$  as the charge carrier. (**C**) Bar chart of  $i_{\text{Ba}}$  and  $i_{\text{Ca}}$  single-channel activity ( $nP_o$ ). Data are presented as means  $\pm$  SEM (\*\* $p < 0.01$ ). (**D**) Calibrated TIRF image of an adult ventricular myocyte dialyzed with the  $\text{Ca}^{2+}$  indicator dye Rhod-2 via the patch pipette (see also **Video 1**). Time courses of  $[\text{Ca}^{2+}]_i$  from each sparklet site (indicated by green circles on TIRF image) and their  $\kappa$  values are shown in panels **A-E**. (**E**) All-points histogram of  $\text{Ca}^{2+}$  sparklet data recorded from adult ventricular myocytes. The data were fit with a multi-component Gaussian function (solid black line).

DOI: [10.7554/eLife.05608.003](https://doi.org/10.7554/eLife.05608.003)

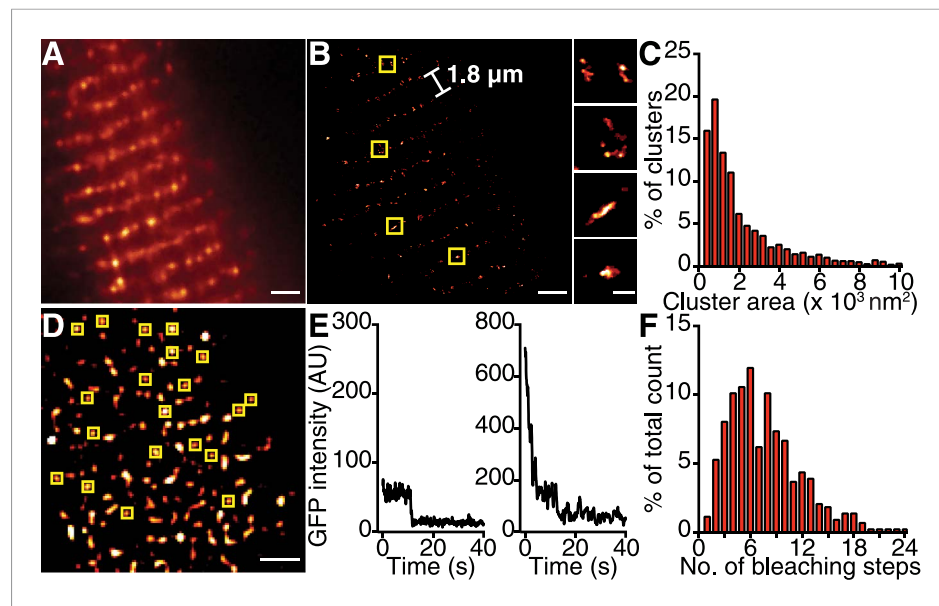

**Figure 2.** Ca<sub>v</sub>1.2 channels form clusters in the ventricular myocyte PM. (A) TIRF image of a fixed, adult mouse ventricular myocyte immunolabeled with an antibody specific for Ca<sub>v</sub>1.2 channels. (B) Super-resolution GSD image of the same cell. Channels are located along the t-tubule network with the characteristic 1.8-μm separation. Yellow boxes denote location of higher-magnification images of channel clusters (right). (C) Distribution of cluster areas in ventricular myocytes (*n* = 5 myocytes). (D) An average of the first five frames of a TIRF image time series taken of a myocyte isolated from mice expressing Ca<sub>v</sub>β<sub>2a</sub>-PA-GFP. Yellow boxes indicate spots selected for analysis. Scale bars = 2 μm. (E) Examples of bleaching steps for Ca<sub>v</sub>β<sub>2a</sub>-PA-GFP associated with Ca<sub>v</sub>1.2 channels. (F) Distribution of bleaching steps obtained from 435 spots selected from *n* = 11 cells.

DOI: [10.7554/eLife.05608.005](https://doi.org/10.7554/eLife.05608.005)

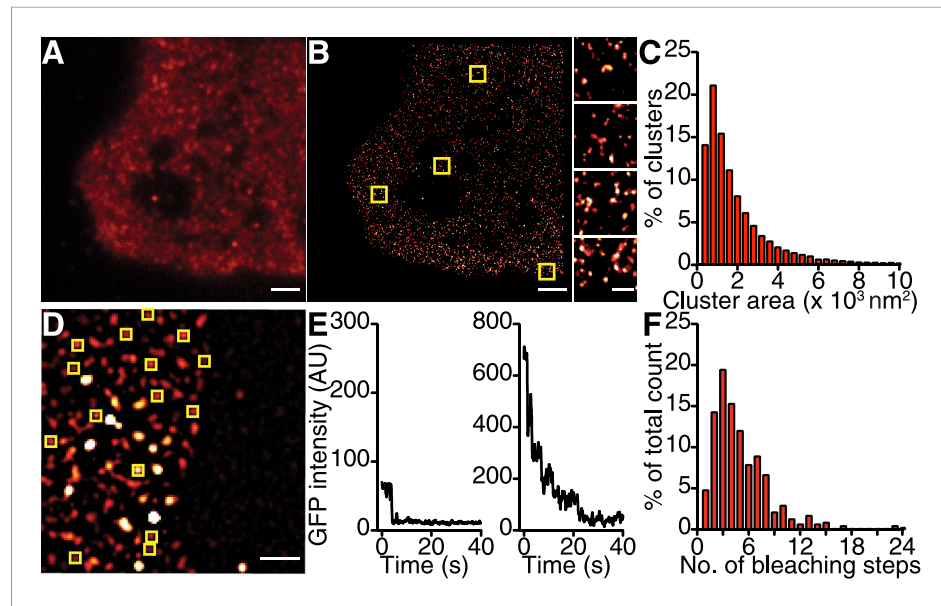

**Figure 3.** Ca<sub>v</sub>1.2 channels form clusters in tsA-201 cell membranes. (A and B) TIRF and GSD images of immunolabeled Ca<sub>v</sub>1.2 channels in a transfected tsA-201 cell (A). Yellow boxes in (B) indicate the location of each higher-magnification image (right). (C) Distribution of cluster areas in tsA-201 cells (n = 9 cells). (D) An average of the first five frames of a TIRF image time series for a tsA-201 cell expressing Ca<sub>v</sub>1.2-EGFP. (E) Examples of bleaching steps for Ca<sub>v</sub>1.2-EGFP. Scale bars = 2 μm. (F) Distribution of bleaching steps obtained from 484 spots selected from n = 10 cells.

DOI: [10.7554/eLife.05608.006](https://doi.org/10.7554/eLife.05608.006)

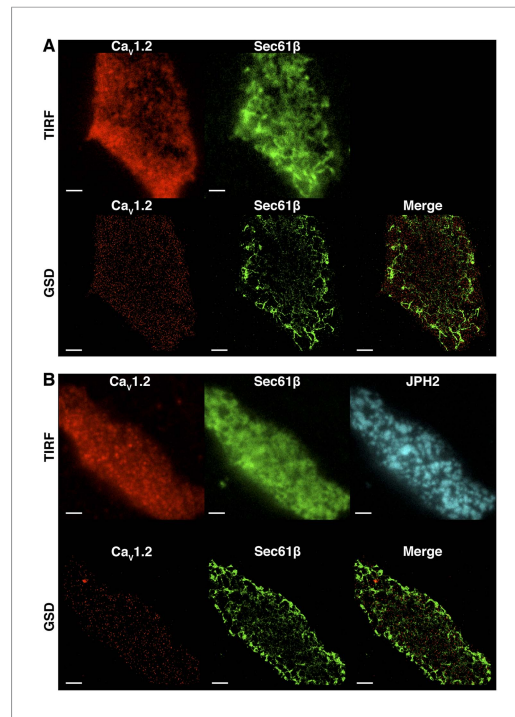

**Figure 3—figure supplement 1.** Ca<sub>v</sub>1.2 channel clusters are not co-localized to tsA-201 ER structures. **(A)** TIRF (top) and GSD (bottom) images of immunolabeled Ca<sub>v</sub>1.2 channels (*left*) and mCherry-Sec61β (*middle*) in a transfected tsA-201 cell. The image on the bottom right was generated by merging Ca<sub>v</sub>1.2 and mCherry-Sec61β GSD images. **(B)** Top: TIRF images of immunolabeled Ca<sub>v</sub>1.2 channels (*left*), mCherry-Sec61β (*middle*), and JPH2 (*right*) in a transfected tsA-201 cell. Bottom: GSD images from the same cell showing Ca<sub>v</sub>1.2 channels (*left*), mCherry-Sec61β (*middle*), and a merge of the two (*right*). Scale bars = 2 μm.

DOI: [10.7554/eLife.05608.007](https://doi.org/10.7554/eLife.05608.007)

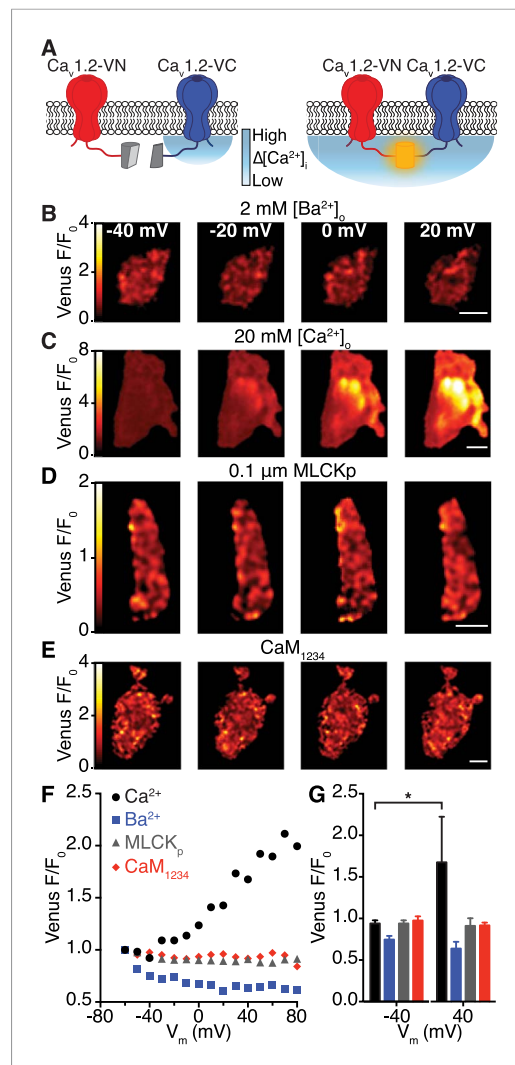

**Figure 4.** Interactions between Ca<sub>v</sub>1.2 channel C-termini occur spontaneously and in a Ca<sup>2+</sup>/CaM-dependent manner. **(A)** Illustration of the bimolecular fluorescence complementation strategy for assaying interactions between Ca<sub>v</sub>1.2 channel C-termini. Non-interacting channels tagged at their C-terminus with either the N- or C-terminal half of split Venus are non-fluorescent (*left*). Spontaneous interactions between channel C-termini result in reconstitution of Venus and emission of fluorescence (*right*). **(B–E)** TIRF images obtained from whole-cell patch-clamped tsA-201 cells expressing Ca<sub>v</sub>1.2-VN and Ca<sub>v</sub>1.2-VC over 9-s voltage steps to the indicated potentials. Images were median-filtered, smoothed, pseudo-colored with a 'red-hot' LUT, and divided by the initial -60 mV image to obtain calibrated Venus F/F<sub>0</sub>. Experiments were performed with 2 mM Ba<sup>2+</sup> **(B)** or 20 mM Ca<sup>2+</sup> **(C–E)** in the perfusing solution. Scale bars = 3 μm. (See also **Figure 4—figure supplement 2**) **(D)** Images obtained during dialysis with MLCKp (0.1 μM). **(E)** Images from a cell in which CaM<sub>1234</sub> was co-expressed with Ca<sub>v</sub>1.2-VN and Ca<sub>v</sub>1.2-VC (see also **Figure 4—figure supplement 3**). **(F)** Relationship between Venus F/F<sub>0</sub> and V<sub>m</sub> (mV) for Ca<sup>2+</sup> (black circles), Ba<sup>2+</sup> (blue squares), MLCK<sub>p</sub> (grey triangles), and CaM<sub>1234</sub> (red diamonds). **(G)** Bar graph showing Venus F/F<sub>0</sub> at -40 mV and 40 mV for Ca<sup>2+</sup> (black), Ba<sup>2+</sup> (blue), MLCK<sub>p</sub> (grey), and CaM<sub>1234</sub> (red). A significant difference (\*) is indicated for Ca<sup>2+</sup> between -40 mV and 40 mV.

Figure 4. Continued

between membrane voltage and Venus reconstitution for each experimental condition. (G) Bar chart showing mean Venus fluorescence ( $F/F_0$ )  $\pm$  SEM for each condition at  $-40$  and  $+40$  mV ( $*p < 0.05$ ).

DOI: [10.7554/eLife.05608.008](https://doi.org/10.7554/eLife.05608.008)

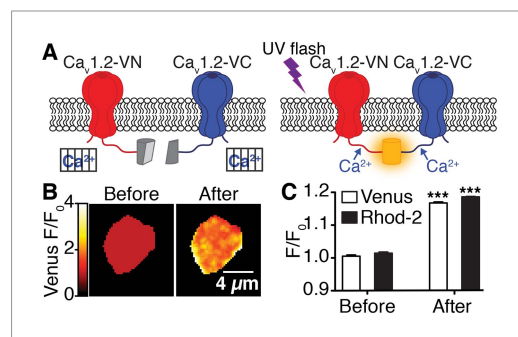

**Figure 4—figure supplement 1.** Flash photolysis of caged  $\text{Ca}^{2+}$  stimulates  $\text{Ca}_v1.2$  interactions. (A) Illustration of flash photolysis-induced bimolecular fluorescence complementation. Prior to uncaging of  $\text{Ca}^{2+}$ , cells were bathed in a zero  $\text{Ca}^{2+}$  solution; under these conditions, split-Venus-tagged channels do not interact (left). Upon application of a UV flash to uncage  $\text{Ca}^{2+}$ , interactions between the channel C-termini results in reconstitution of Venus protein and emission of fluorescence (right). (B) Confocal images of Venus fluorescence emission ( $F/F_0$ ) before and after flash photolysis of caged  $\text{Ca}^{2+}$ . (C) The bar chart shows mean Venus and Rhod-2 fluorescence emission ( $F/F_0$ )  $\pm$  SEM before and after  $\text{Ca}^{2+}$  uncaging ( $***p < 0.001$ , for comparison of  $\text{Ca}_v1.2$  interactions [Venus reconstitution] and intracellular  $\text{Ca}^{2+}$  concentration [Rhod-2 emission] before and after flash photolysis of caged  $\text{Ca}^{2+}$ ; paired t-test).

DOI: [10.7554/eLife.05608.009](https://doi.org/10.7554/eLife.05608.009)

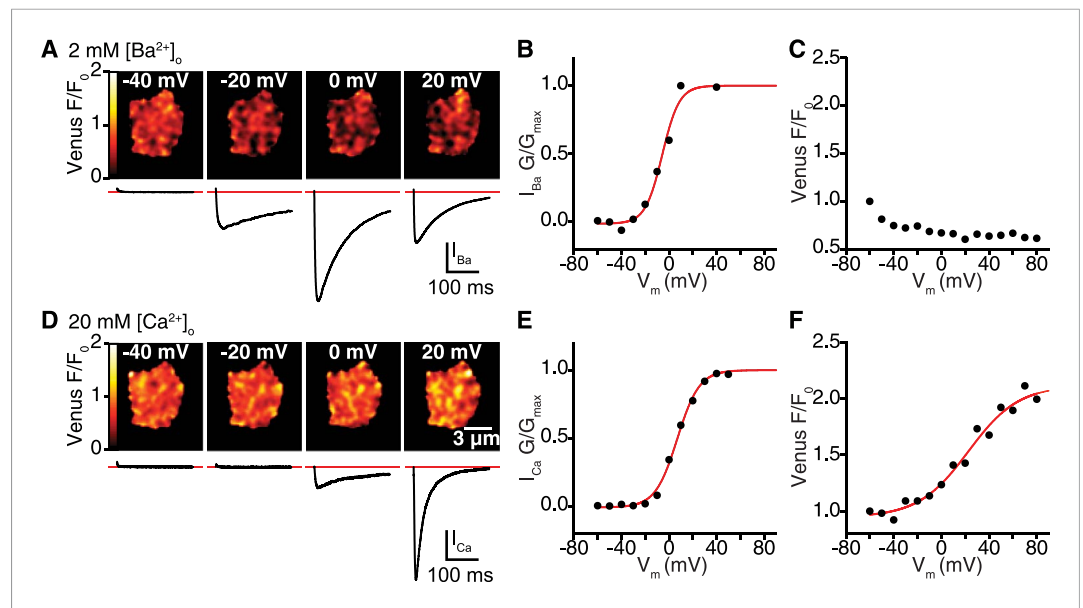

**Figure 4—figure supplement 2.**  $\text{Ca}_v1.2$  interactions are  $\text{Ca}^{2+}$  dependent. (A–C) Venus fluorescence and  $\text{Ca}_v1.2$  currents were recorded in whole-cell mode from tsA-201 cells expressing  $\text{Ca}_v1.2\text{-VN}$  and  $\text{Ca}_v1.2\text{-VC}$  during depolarizing voltage steps to -40, -20, 0 and +20 mV with  $\text{Ba}^{2+}$  as the charge carrier (2 mM  $[\text{Ba}^{2+}]_o$ ). Voltage dependencies were fit with a Boltzmann sigmoidal function (red solid line) except in (C), where Venus  $F/F_0$  decayed exponentially during the voltage protocol in a manner reminiscent of photobleaching. (A) Calibrated Venus  $F/F_0$  TIRF images (top) and  $I_{\text{Ba}}$  (bottom) from a representative tsA-201 cell. (B) Voltage dependence of normalized conductance. (C) Venus fluorescence ( $F/F_0$ ) plots. (D–F) Venus fluorescence and  $\text{Ca}_v1.2$  currents were recorded as above (A–C) with  $\text{Ca}^{2+}$  as the charge carrier (20 mM  $[\text{Ca}^{2+}]_o$ ). (D) Calibrated Venus  $F/F_0$  TIRF images (top) and  $I_{\text{Ca}}$  (bottom) from a representative tsA-201 cell. (E) Voltage dependence of normalized conductance. (F) Venus fluorescence ( $F/F_0$ ) plots. Voltage dependencies were fit with a Boltzmann sigmoidal function (red solid line).

DOI: 10.7554/eLife.05608.010

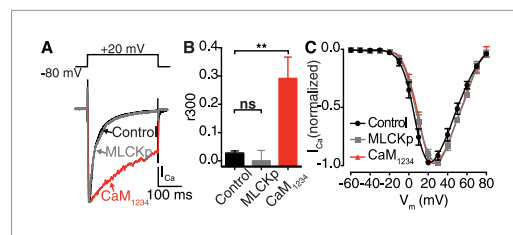

**Figure 4—figure supplement 3.**  $\text{Ca}^{2+}$  binding to distinct CaM pools regulates CDI. (A–C) tsA-201 cells expressing  $\text{Ca}_v1.2$  were subjected to a 300-ms depolarization from a holding potential of -80 mV to a test potential of +20 mV in the presence of 20 mM  $[\text{Ca}^{2+}]_o$ . (A)  $I_{\text{Ca}}$  elicited under control conditions (20 mM  $[\text{Ca}^{2+}]_o$ ), with 0.1  $\mu\text{M}$  MLCKp dialyzed via the patch pipette, and in cells co-expressing  $\text{Ca}^{2+}$ -insensitive  $\text{CaM}_{1234}$ . (B) Mean  $r_{300}$  ratios  $\pm$  SEM (\*\* $p = 0.002$ ). (C) Current-voltage relationships.

DOI: 10.7554/eLife.05608.011



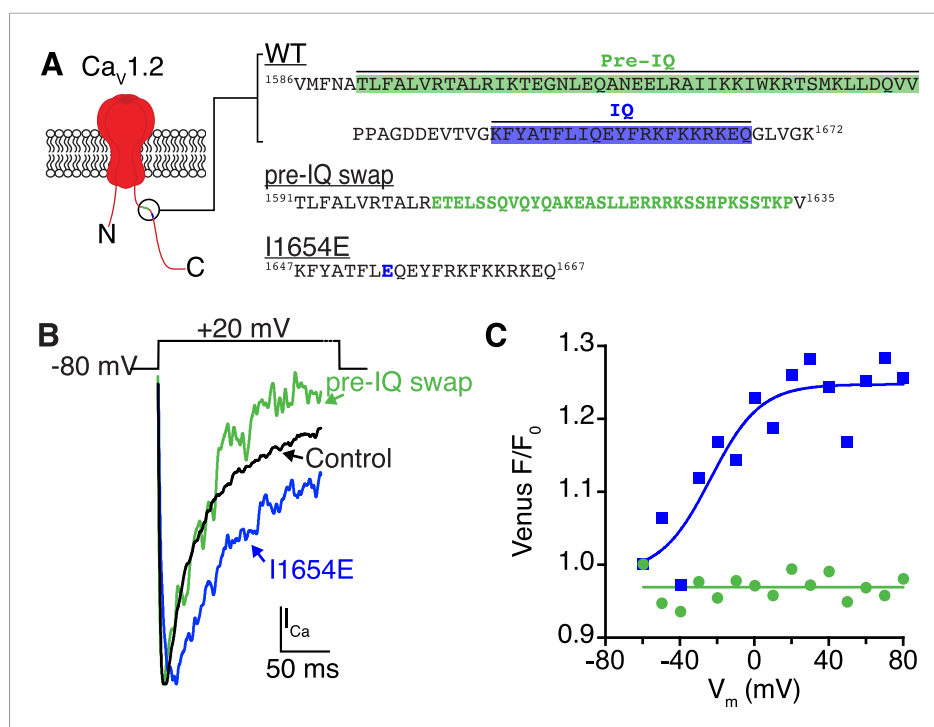

**Figure 4—figure supplement 4.** Ca<sup>2+</sup>/CaM binding to the pre-IQ domain, and not the IQ domain, mediates channel coupling. **(A)** Illustration of the pore-forming subunit of a Ca<sub>v</sub>1.2 channel embedded in the PM, with intracellular N and C-termini. The C-terminus contains pre-IQ (green) and IQ (blue) motifs, which are known to bind CaM. The amino acid sequence of the pre-IQ and IQ segments of the C-terminus of WT, pre-IQ swap, and I1654E mutant channels used in this study are shown on the right. For the pre-IQ swap, a 33-amino-acid segment was replaced with 33 non-identical amino acids. For the I1654E mutation, a point mutation was made replacing I1654 with E. **(B)** I<sub>Ca</sub> elicited by a depolarizing step from -80 mV to a test potential of +20 mV under control conditions (20 mM [Ca<sup>2+</sup>]<sub>o</sub>) in tsA-201 cells expressing WT (black), I1624E (blue), or pre-IQ swap (green) Ca<sub>v</sub>1.2 channels. **(C)** Venus fluorescence (F/F<sub>0</sub>) plots for the two mutant channels. Ca<sub>v</sub>1.2(I1624E) channels exhibited a voltage-dependent increase in Venus reconstitution that fit a Boltzmann sigmoidal function (blue solid line; *n* = 5). Venus F/F<sub>0</sub> decayed over the course of the voltage protocol in cells expressing Ca<sub>v</sub>1.2(pre-IQ swap) (*n* = 8).

DOI: [10.7554/eLife.05608.012](https://doi.org/10.7554/eLife.05608.012)

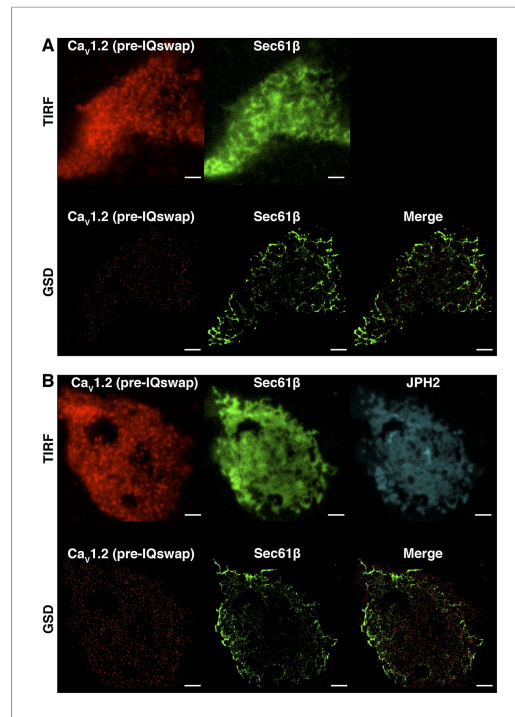

**Figure 4—figure supplement 5.**  $Ca_v1.2$  channel clustering is necessary but not sufficient for functional coupling. **(A)** TIRF (top) and super-resolution GSD (bottom) images of immunolabeled  $Ca_v1.2$ (pre-IQ swap) channels (left) and mCherry-Sec61 $\beta$  (middle) in an exemplary transfected tsA-201 cell. The image on the bottom right was generated by merging  $Ca_v1.2$ (pre-IQ swap) and mCherry-Sec61 $\beta$  GSD images. **(B)** Top: TIRF images of immunolabeled  $Ca_v1.2$ (pre-IQ swap) channels (left), mCherry-Sec61 $\beta$  (middle), and JPH2-GFP (right) in a transfected tsA-201 cell. Bottom: GSD images from the same cell showing  $Ca_v1.2$ (pre-IQ swap) channels (left), mCherry-Sec61 $\beta$  (middle), and a merge of the two (right). Scale bars = 2  $\mu$ m.

DOI: [10.7554/eLife.05608.013](https://doi.org/10.7554/eLife.05608.013)

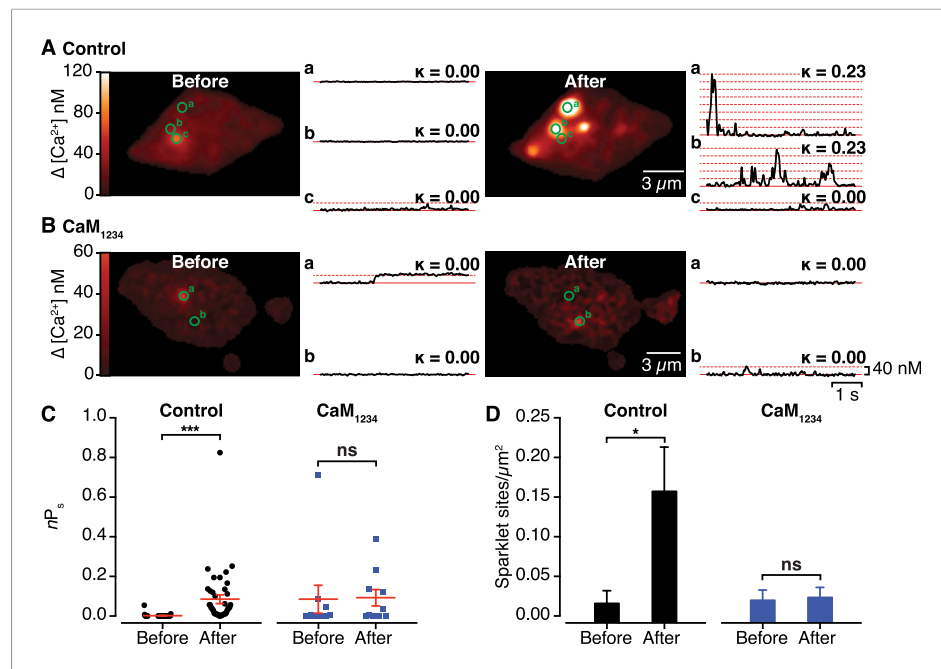

**Figure 5.** Effects of interactions between  $\text{Ca}_v1.2$  channel C-termini on channel activity. **(A and B)** Calibrated TIRF images (see also **Video 2**) of representative control tsA-201 cells **(A)** and tsA-201 cells expressing the  $\text{Ca}^{2+}$ -insensitive  $\text{CaM}_{1234}$  mutant **(B)**. In both cases, cells expressed  $\text{Ca}_v1.2\text{-VN}$  and  $\text{Ca}_v1.2\text{-VC}$  and were loaded with Rhod-2 via the patch pipette. Cells were held at  $-80$  mV during sparklet recordings before (*left*) and after (*right*) depolarization to  $+60$  mV. The time course of  $[\text{Ca}^{2+}]_i$  for each sparklet site (denoted by green circles) before and after depolarization is shown to the right of each image. **(C and D)** Scatter plots of sparklet activity **(C;  $nP_s$ ; \*\*\* $p < 0.001$ )** and sparklet site density **(D; \* $p = 0.03$ )**, before and after depolarization in control ( $n = 5$ ) and  $\text{CaM}_{1234}$ -expressing ( $n = 6$ ) cells. ns, not significant.

DOI: [10.7554/eLife.05608.014](https://doi.org/10.7554/eLife.05608.014)

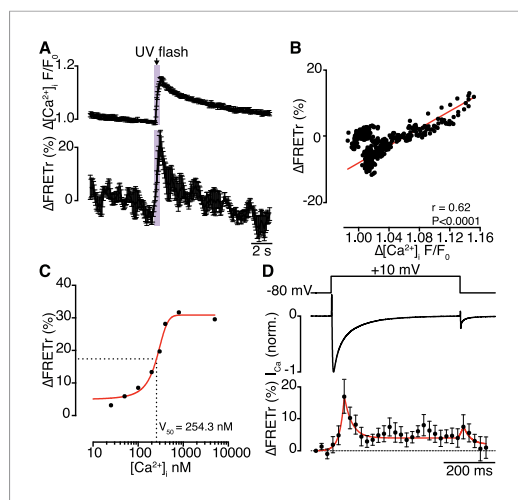

**Figure 6.** Interactions of  $\text{Ca}_v1.2$  C-termini occur dynamically with  $\text{Ca}^{2+}$  influx and are transiently persistent. **(A)** Time course of the percent change in FRETr (bottom) evoked by flash photolysis of caged  $\text{Ca}^{2+}$  (purple box). Experiments were performed at a holding potential of  $-80$  mV with zero EGTA or BAPTA; thus, the change in  $[\text{Ca}^{2+}]_i$  ( $F/F_0$ ; top) was global. Averaged traces ( $n = 5$  cells) and error bars showing SEM at each sampling point. **(B)** Correlation between changes in FRETr and global  $[\text{Ca}^{2+}]_i$  produced by caged  $\text{Ca}^{2+}$  photolysis, showing that increases in  $[\text{Ca}^{2+}]_i$  were accompanied by an increase in FRETr ( $p < 0.0001$ ). **(C)** Plot of the percent change in FRETr vs  $[\text{Ca}^{2+}]_i$  (nM). Data ( $n = 8$  cells) were fit to a Boltzmann Sigmoidal function (solid red line) with  $V_{50} = 254.3$  nM (black dashed line). **(D)** Step depolarization (top) in the presence of 10 mM EGTA produced local  $[\text{Ca}^{2+}]_i$  elevation and inactivating  $I_{\text{Ca}}$  (middle). Increased channel interactions, represented as the percent change in FRETr (bottom; averaged from  $n = 6$  cells), were detected at the onset of depolarization and repolarization during the peak and tail currents. Dashed line shows FRETr baseline level.

DOI: [10.7554/eLife.05608.016](https://doi.org/10.7554/eLife.05608.016)

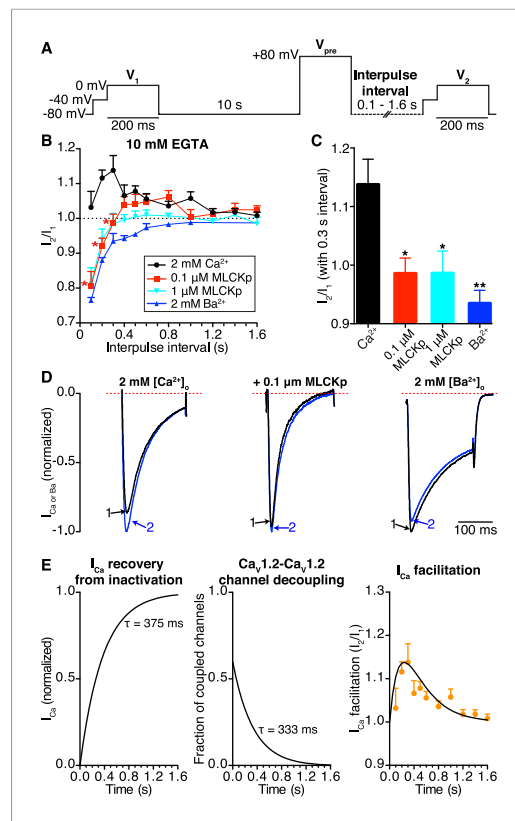

**Figure 7.**  $Ca_v1.2$ -to- $Ca_v1.2$  channel coupling is critical for  $I_{Ca}$  facilitation in cardiomyocytes. **(A)** Voltage protocol used to evoke  $I_1$  and  $I_2$  in ventricular myocytes. **(B)** Line chart summarizing the current amplitude ratio ( $I_2/I_1$ ) at 0 mV for each condition over the range of interpulse intervals from 0.1 to 1.6 s. **(C)** Bar chart summarizing the current-amplitude ratio ( $I_2/I_1$ ) with a fixed interpulse interval of 300 ms for each condition. **(D)** Normalized whole-cell currents evoked by the protocol in **(A)**, with 2 mM  $[Ca^{2+}]_o$  as the charge carrier without (left) or with (middle) intracellular dialysis of 0.1  $\mu$ M MLCKp (middle). The currents on the right were recorded with 2 mM  $[Ba^{2+}]_o$  as the charge carrier. Data are shown as means + SEM (\* $p < 0.05$ , \*\* $p < 0.01$  vs control (2 mM  $[Ca^{2+}]_o$ )). **(E)** Simulated time-course of  $I_{Ca}$  recovery from inactivation (left),  $Ca_v1.2$ - $Ca_v1.2$  channel cluster disassembly (middle), and  $I_{Ca}$  facilitation (solid black line; right). Recovery and channel decoupling curves are single exponential functions with time constants ( $\tau$ ) of 375 ms and 333 ms, respectively. The  $I_{Ca}$  facilitation curve is the product of the recovery and decoupling functions. For comparison, the experimental facilitation data (orange circles) collected with 2 mM  $[Ca^{2+}]_o$  as the charge carrier is plotted alongside the simulated  $I_{Ca}$  facilitation data. The amplitude of the decoupling function was scaled to fit the facilitation data.

DOI: [10.7554/eLife.05608.017](https://doi.org/10.7554/eLife.05608.017)

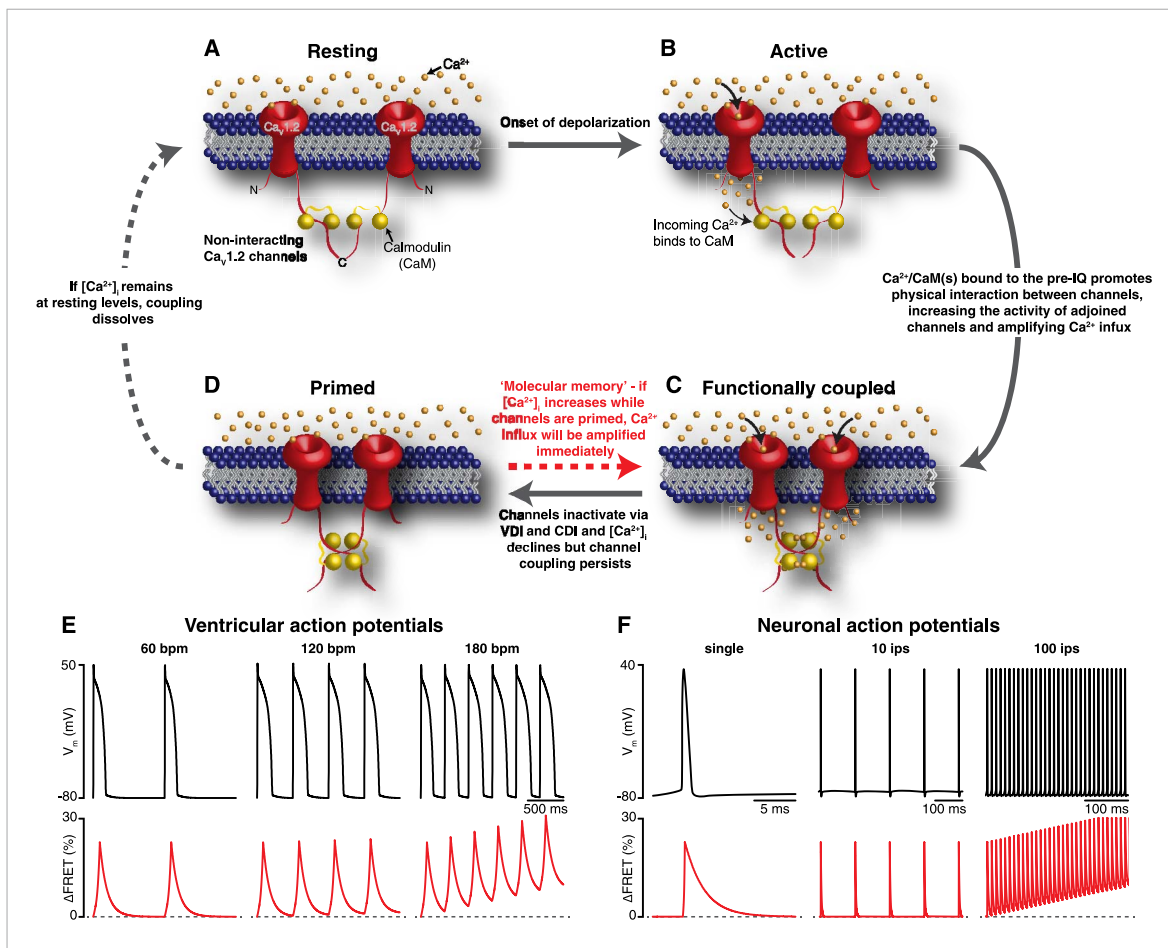

**Figure 8.** Mechanism and proposed model for the functional coupling of  $\text{Ca}_v1.2$  channels. **(A)**  $\text{Ca}_v1.2$  channels are arranged into clusters in the PM of excitable cells; for simplicity, a cluster of two channels is shown. At the resting membrane potential (e.g.,  $-80$  mV),  $[\text{Ca}^{2+}]_i$  and  $\text{Ca}_v1.2$   $P_o$  are low; hence, the majority of  $\text{Ca}_v1.2$  channels are non-interacting. **(B)** During an action potential, the PM becomes depolarized, increasing the  $P_o$  of independently gating  $\text{Ca}_v1.2$  channels.  $\text{Ca}^{2+}$  flows into the cell through these active channels, producing an elevation in local  $[\text{Ca}^{2+}]_i$  and increasing  $\text{Ca}^{2+}$  binding to CaM. **(C)**  $\text{Ca}^{2+}/\text{CaM}$  binding to the C-terminal pre-IQ domain of the  $\text{Ca}_v1.2$  channel promotes physical interactions between adjacent channels. This functional coupling increases the activity of adjoined channels and thus amplifies  $\text{Ca}^{2+}$  influx. **(D)**  $\text{Ca}_v1.2$  channels undergo VDI and CDI, and  $[\text{Ca}^{2+}]_i$  declines once more. However, the channels remain coupled in a 'primed', non-conducting state for a finite time. If the membrane is depolarized again when the channels are still primed, the amplification of  $\text{Ca}^{2+}$  influx will be immediate; otherwise, if  $[\text{Ca}^{2+}]_i$  remains at resting levels beyond the lifetime of the primed state, the coupling dissolves and the cycle begins again. **(E)** and **(F)** show proposed rate-dependent changes in  $\text{Ca}_v1.2$  channel coupling in ventricular myocytes and neurons, respectively. *Top*: Simulated ventricular and neuronal action potentials are depicted at low, intermediate, and high firing rates. *Bottom*: The accompanying dynamic change in  $\text{Ca}_v1.2$  channel coupling (reflected by FRET changes between adjacent channels). bpm, beats per minute; ips, impulses per second.

DOI: [10.7554/eLife.05608.018](https://doi.org/10.7554/eLife.05608.018)
