# Supplementary figures and images for: Graded Ca2+/calmodulin-dependent coupling of voltage-gated CaV1.2 channels
Source: eLife journal article supplement (doi:10.7554/elife.05608), 2015-02-24

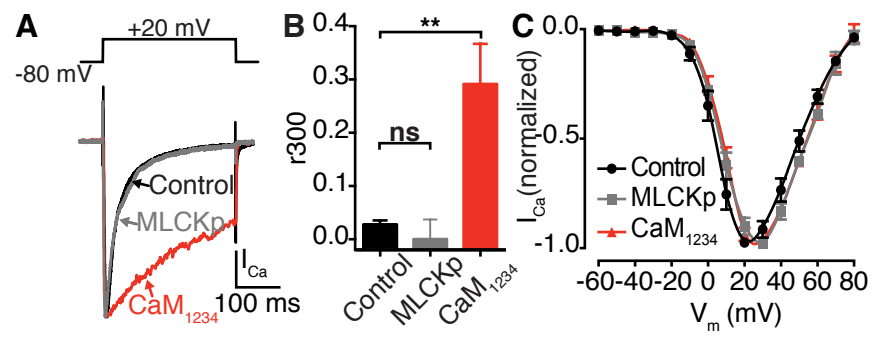

Supplement: supp [file elife-05608-supp-v1.zip]

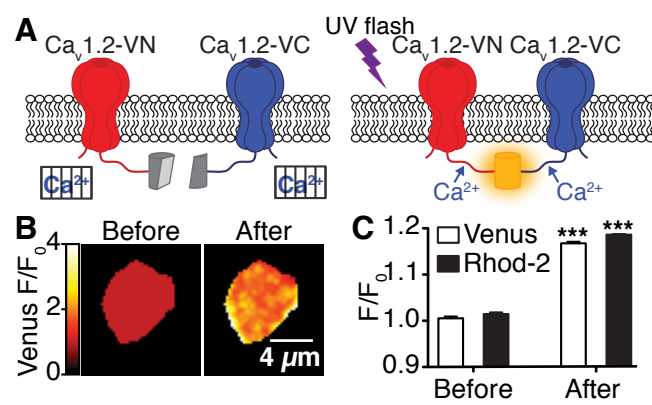

Supplement: supp [file elife-05608-supp-v1.zip]

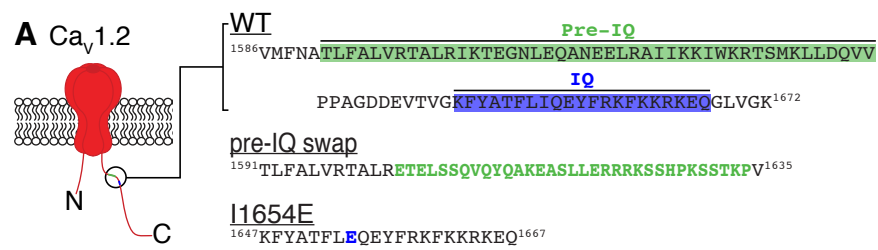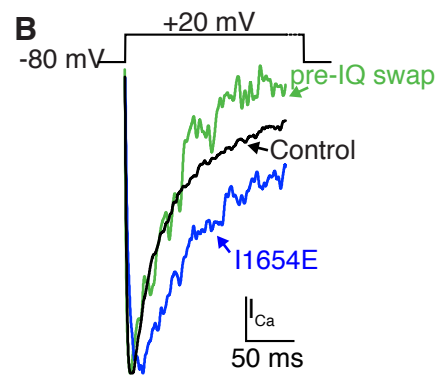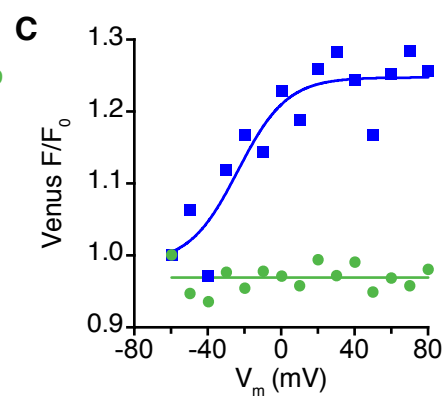

Supplement: supp [file elife-05608-supp-v1.zip]

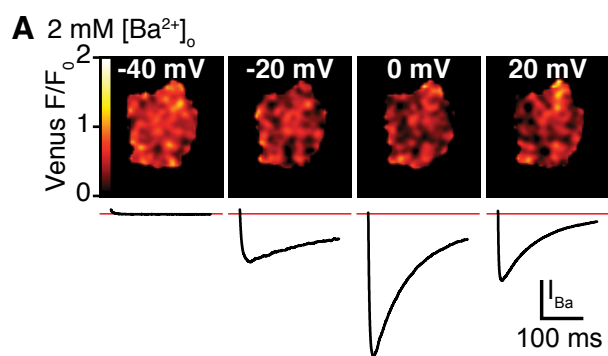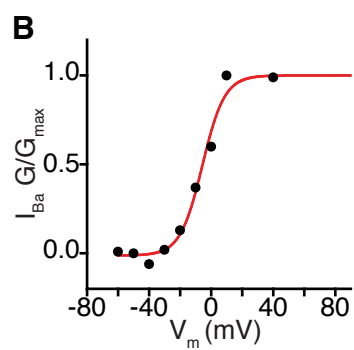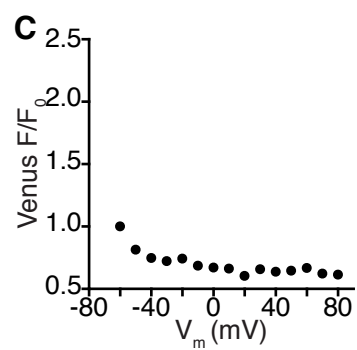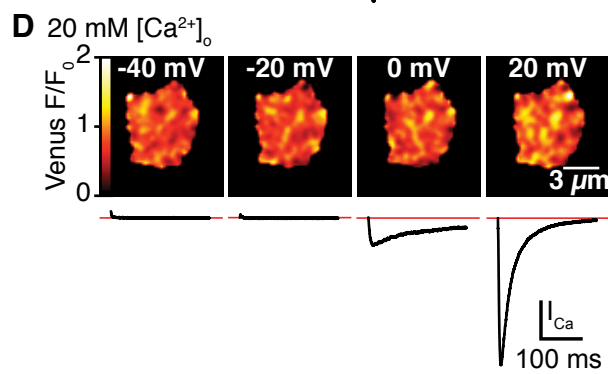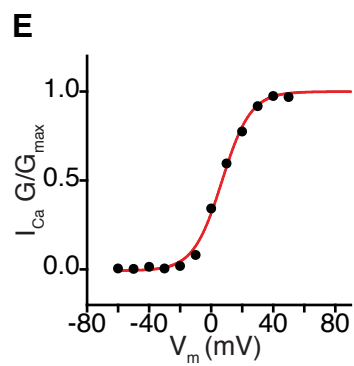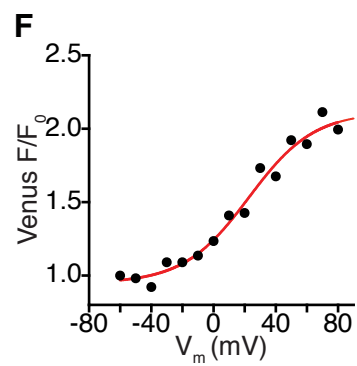

Supplement: supp [file elife-05608-supp-v1.zip]
